# Supplementary material
Source: Research Square preprint supplement (doi:10.21203/rs.3.rs-9159932/v1)
Supplement: Supplementary file 1 [file 5a952a1778740b8b94273df1.docx]

| 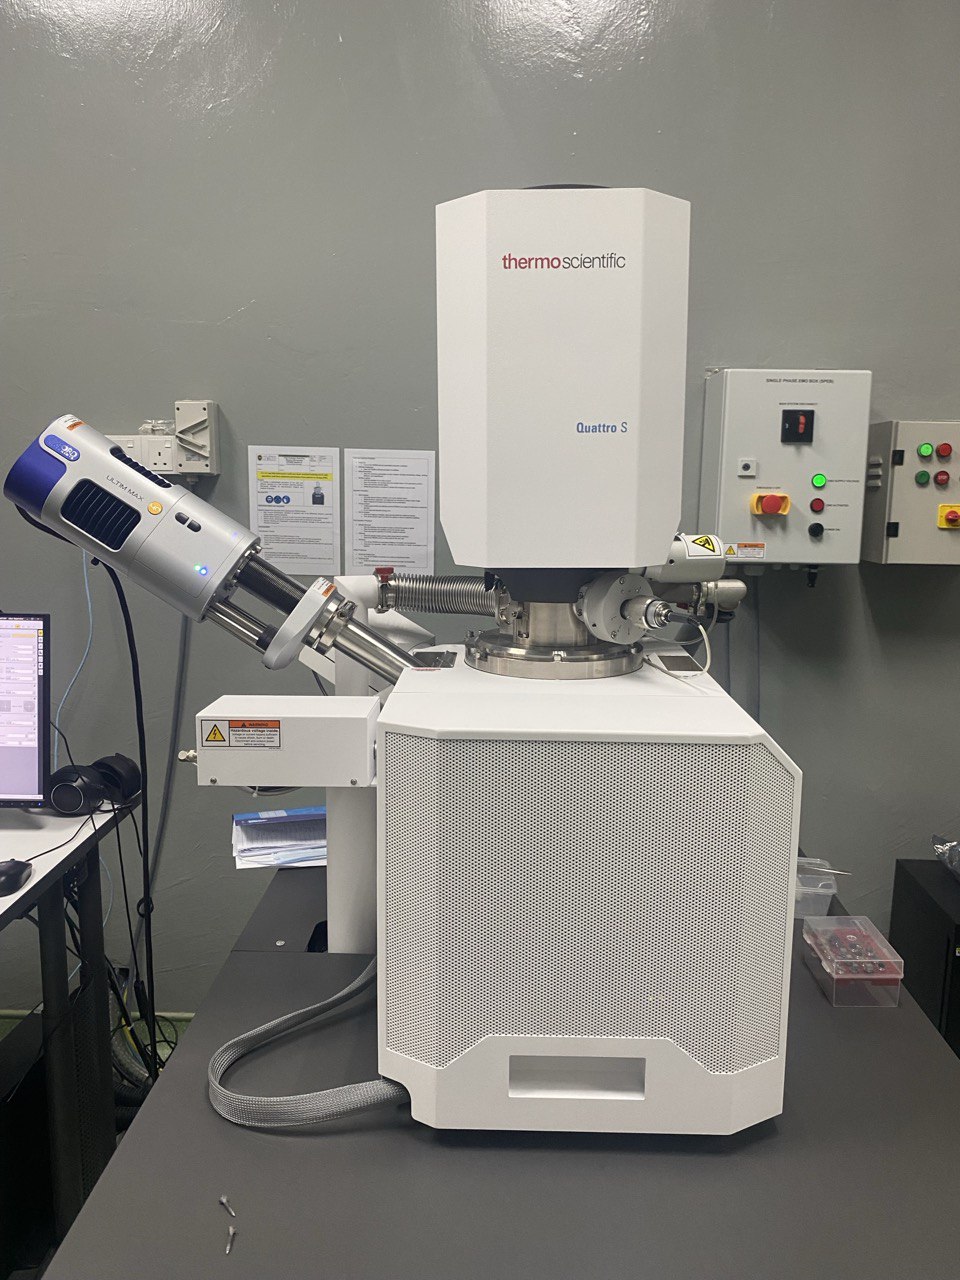 |
| --- |
| | Figure 1. Field-Emission Scanning Electron Microscope (FESEM; Thermo Scientific Quattro S) | | --- | |
| 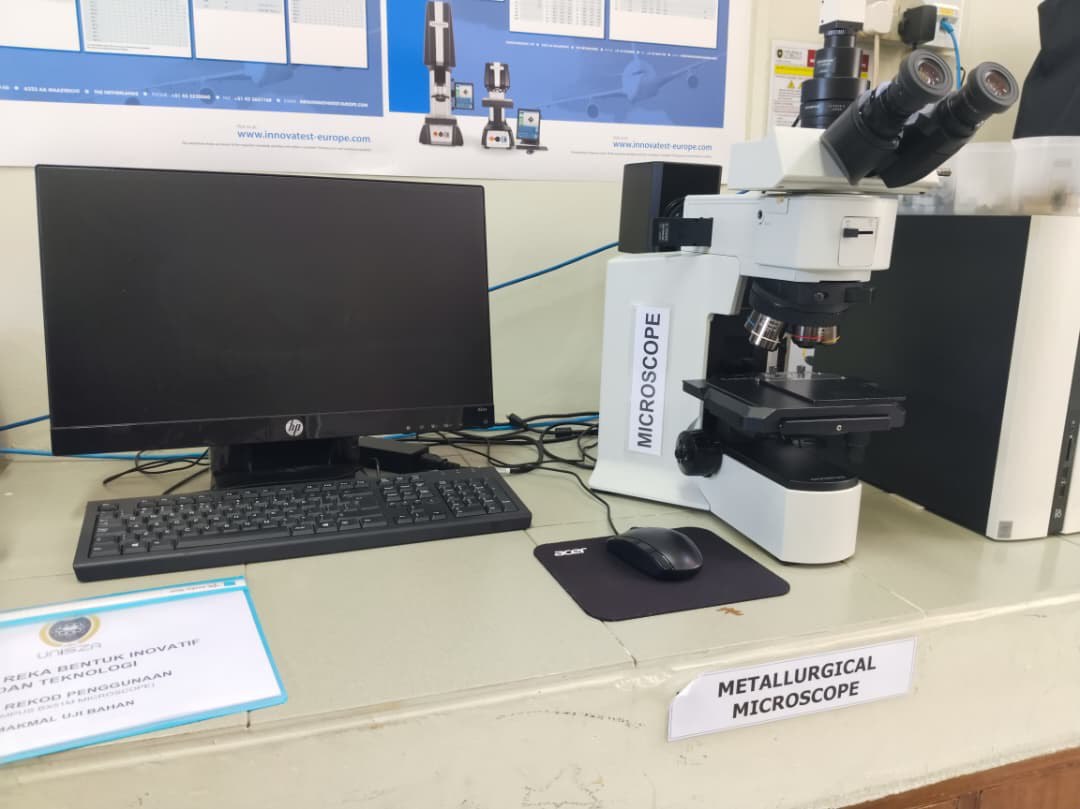 |
| Figure 2. BX51M Optical Microscope (Olympus, Tokyo, Japan) |
| 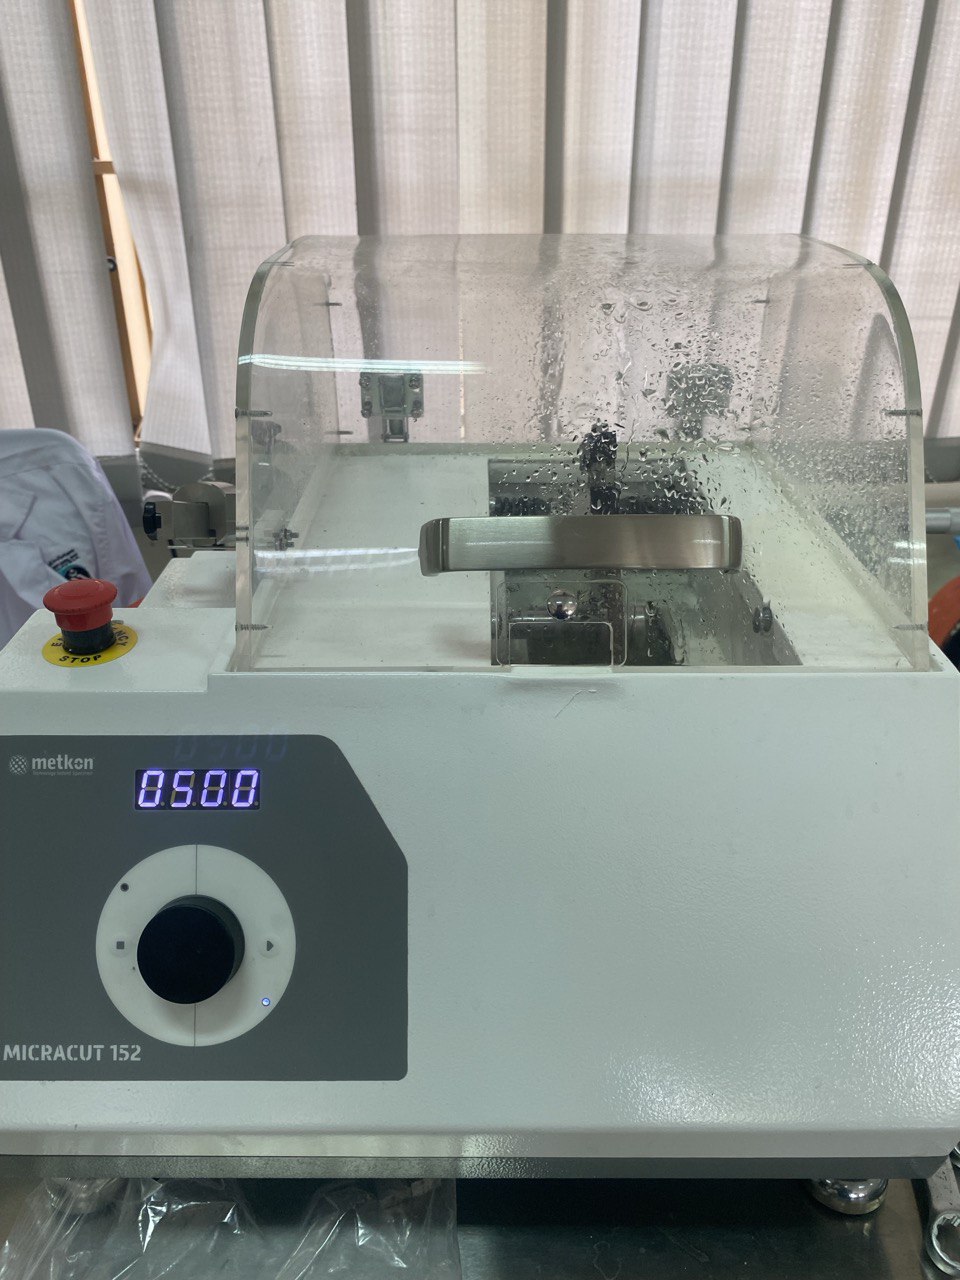 |
| Figure 3. Precision Cutter |
| 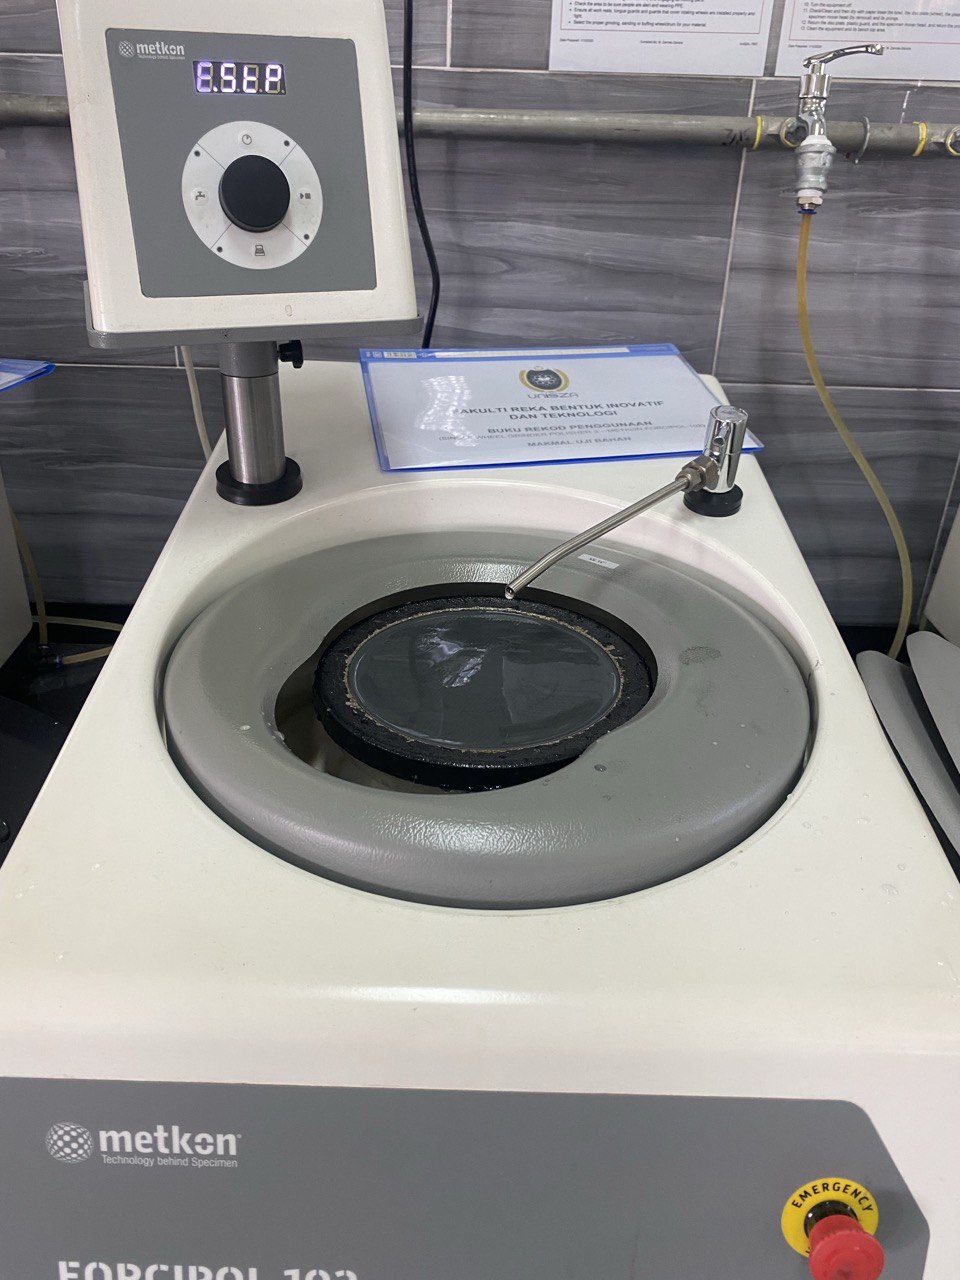 |
| Figure 4. Single Wheel Grinder Polisher |
| 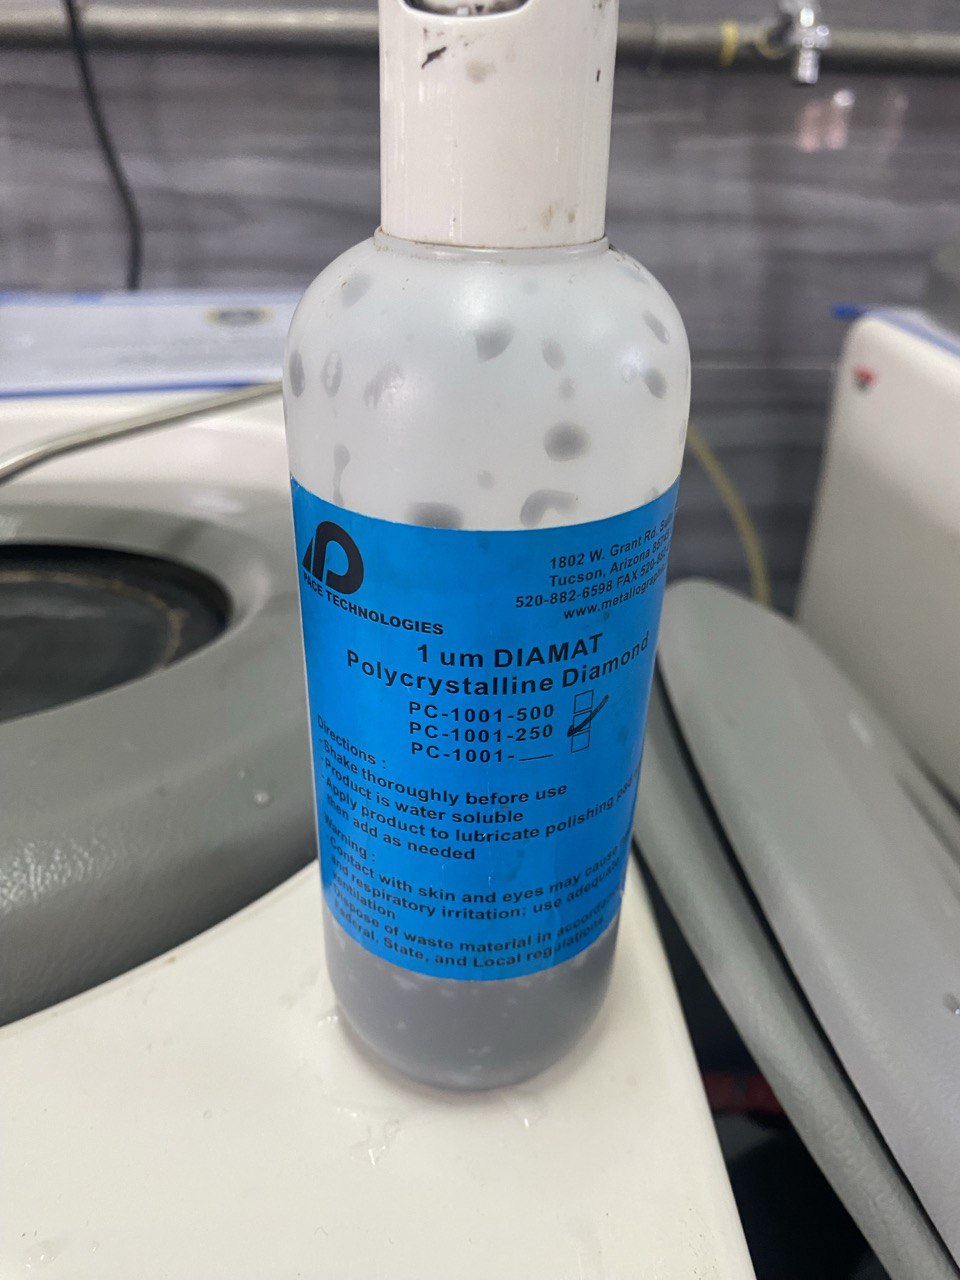 |
| Figure 5. 1µm Polycrystalline Diamond |
| 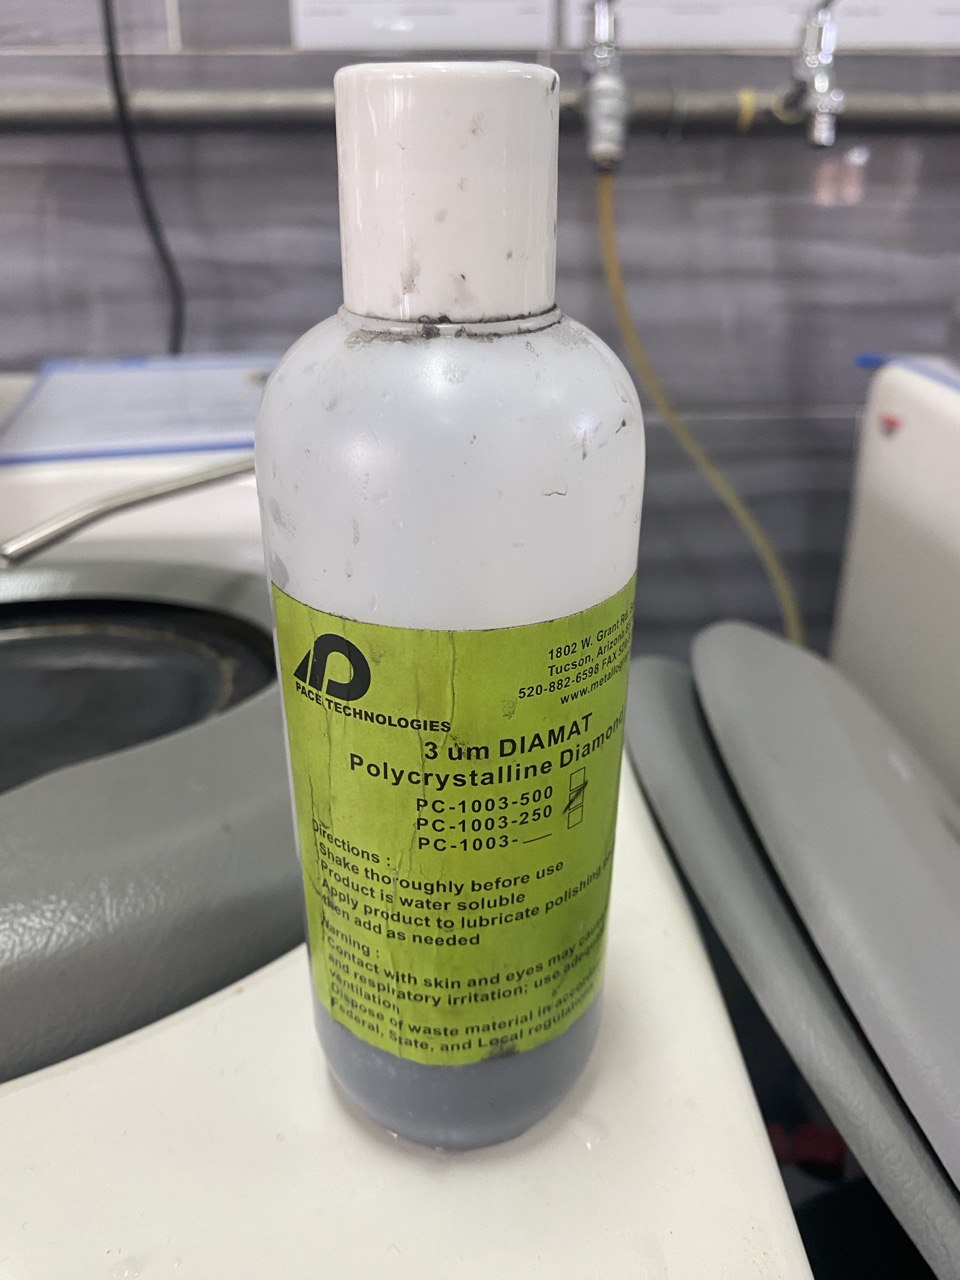 |
| Figure 6. 3µm Polycrystalline Diamond |
| 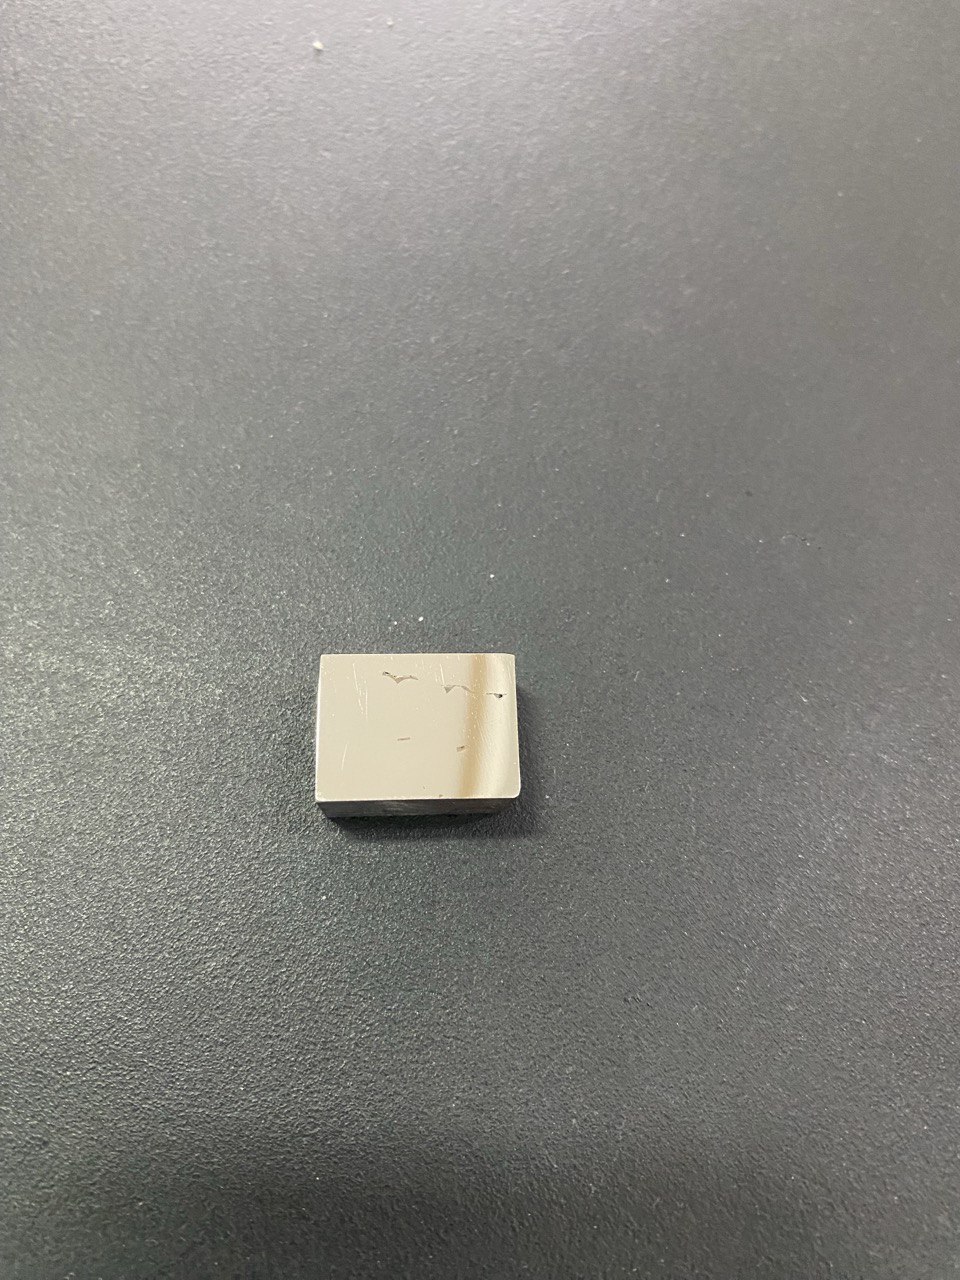 |

Figure 7: Surface of Sample after sample preparation was done using grinding machine and etching in a 2% Nital solution
